Development 133, 3950 (2006) doi:10.1242/dev.02608

## Functional analysis of Sox8 during neural crest development in *Xenopus*

**Michael O'Donnell, Chang-Soo Hong, Xiao Huang, Raymond J. Delnicki and Jean-Pierre Saint-Jeannet**

*Development* **133**, 3817-3826.

The ePress version of this article published on the 30th August 2006 contains a mistake in Fig. 8A,B.

Both the final print and online versions of the article are correct.

We apologise to readers and to the authors for the mistake.
